# Supplementary material
Source: PubMed Central journal article supplement (PMC3690851)
Supplement: 1304097110_pnas.201304097SI.pdf [file 1304097110_pnas.201304097SI.pdf]

# Supporting Information

Jackson et al. 10.1073/pnas.1304097110

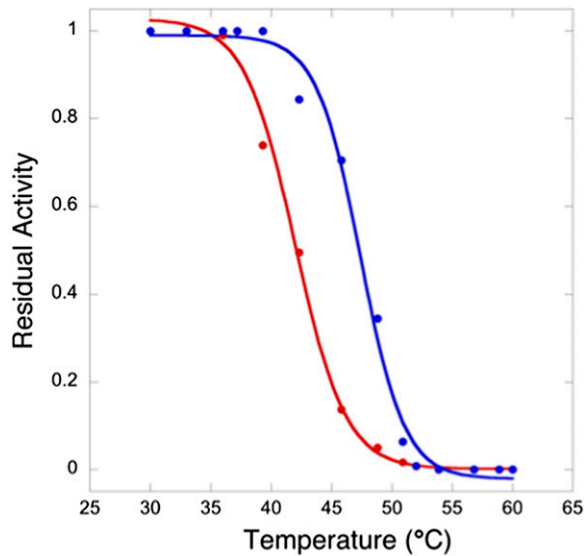

**Fig. S1.** Plot of residual activity of *Lucilia cuprina* (LcαE7; red) and LcαE7-4 (blue). Points are averages of three measurements; protein was incubated at the temperatures indicated for 15 min before being placed on ice. Activity was measured with 4-nitrophenyl butyrate and converted to a percentage of maximum activity.

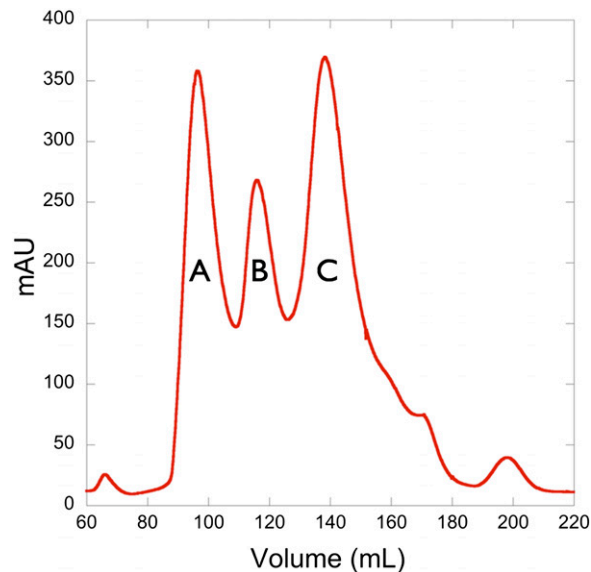

**Fig. S2.** Size exclusion chromatography of LcαE7-4. Pure LcαE7-4 protein (postaffinity chromatography) was loaded onto a Sephacryl S300 column. Protein eluted in three peaks. Peak A corresponds to a high-molecular weight aggregate and did not crystallize in any condition tested. Peak B crystallized as dimeric LcαE7-4. Peak C crystallized as monomeric LcαE7-4.

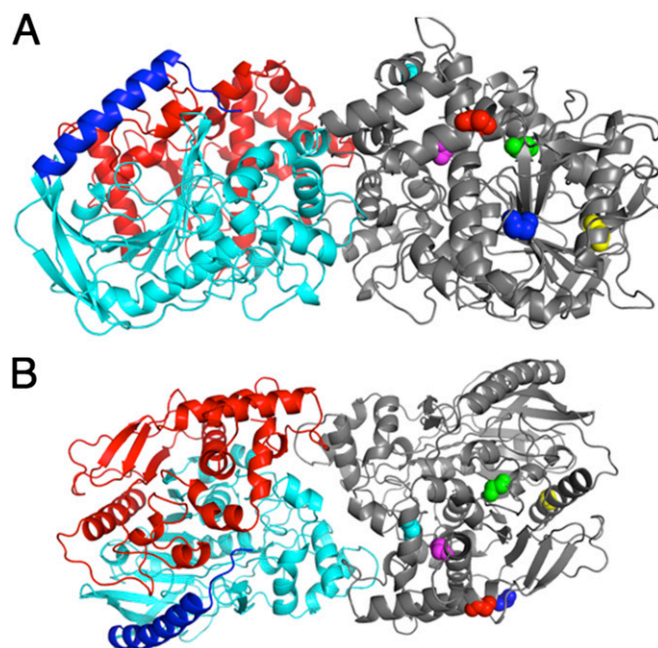

**Fig. 53.** Cartoon of the *LcαE7* dimer from (A) the side and (B) above the active site. The N-terminal membrane association helix is colored blue, the N-terminal one-half of the protein is colored cyan, and the C-terminal one-half is colored red. The locations of stabilizing mutations are shown as spheres (cyan, M364L; magenta, I419F; green, A472T; yellow, I505T; blue, K530E; red, D554G). The biological dimer is pictured, and the dimerization interface is highlighted.

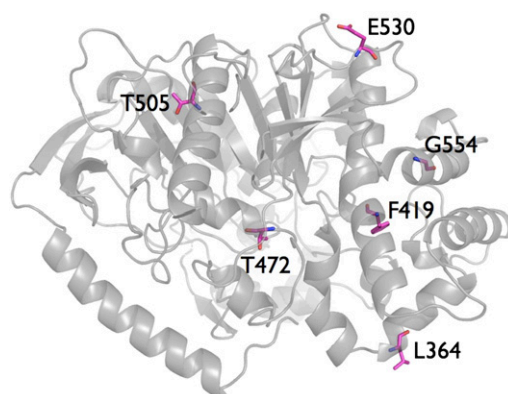

**Fig. 54.** Stabilizing mutations accumulated through directed evolution. The mutations that accumulated are represented as sticks. All mutations were located in the C-terminal one-half of the protein, with M364L, K530E, and D554G being surface-exposed. I419F, I505T, and A472T are located in the interior of the protein.
